# Supplementary material for: From Information Seekers to Innovators: Qualitative Analysis Describing Experiences of the Second Generation of E-Patients
Source: PubMed Central journal article supplement (PMC6714498; doi:10.2196/13022), 2019-08-15
Supplement: jmir_v21i8e13022_app1.pdf [file jmir_v21i8e13022_app1.pdf]

The recruitment text

“Engaged patients or informal caregivers that do more in their self-care and health care, than expected of them. E.g. searching for health information online, have ideas of new solutions/innovations for their self-care and in communication with health care, or track their health to gain further knowledge.”
