# Supplementary material for: From Information Seekers to Innovators: Qualitative Analysis Describing Experiences of the Second Generation of E-Patients
Source: PubMed Central journal article supplement (PMC6714498; doi:10.2196/13022), 2019-08-15
Supplement: jmir_v21i8e13022_app2.pdf [file jmir_v21i8e13022_app2.pdf]

**Multimedia Appendix 2.** The categorization process of the themes.

| <b>Sub-categories</b>                    | <b>Categories</b>                        | <b>Theme</b>                                     |
|------------------------------------------|------------------------------------------|--------------------------------------------------|
| Striving for a change                    | Interaction with health care             | Nondigital factors influencing active engagement |
| Patient safety                           |                                          |                                                  |
| To gain support for health and care      |                                          |                                                  |
| Patients that lead the way               | The strength of peers                    |                                                  |
| Not being alone                          |                                          |                                                  |
| Help me navigate and coordinate the care |                                          |                                                  |
| To monitor and measure over time         | Improved health through self-care        |                                                  |
| Self-care as healing and preventive      |                                          |                                                  |
| To make changes in my way of living      |                                          |                                                  |
| Moving from manual to digital systems    | In the lead of technical innovations     |                                                  |
| Pursues the digitalisation               |                                          |                                                  |
| Digital services that facilitate         |                                          |                                                  |
| Social media                             | Community and support through technology |                                                  |
| Webinars                                 |                                          |                                                  |
| Web-based support                        |                                          |                                                  |
| Web-based research                       | Searching Web-based information          |                                                  |
| Searching engines                        |                                          |                                                  |
| Finding patterns                         |                                          |                                                  |
| Newsletters                              |                                          |                                                  |
